# Supplementary material for: Probing the surface fine structure through electrochemical oscillations
Source: Royal Society of Chemistry journal article supplement (doi:10.1039/c7cp08028j), 2018-01-01
Supplement: c7cp08028j1.pdf [file c7cp08028j1.pdf]

## Probing the surface fine structure through electrochemical oscillations

B. A. F. Previdello, P. S. Fernández, G. Tremiliosi-Filho, H. Varela\*

*Institute of Chemistry of São Carlos, University of São Paulo*

*POBox 780, 13560-970, São Carlos, SP, Brazil.*

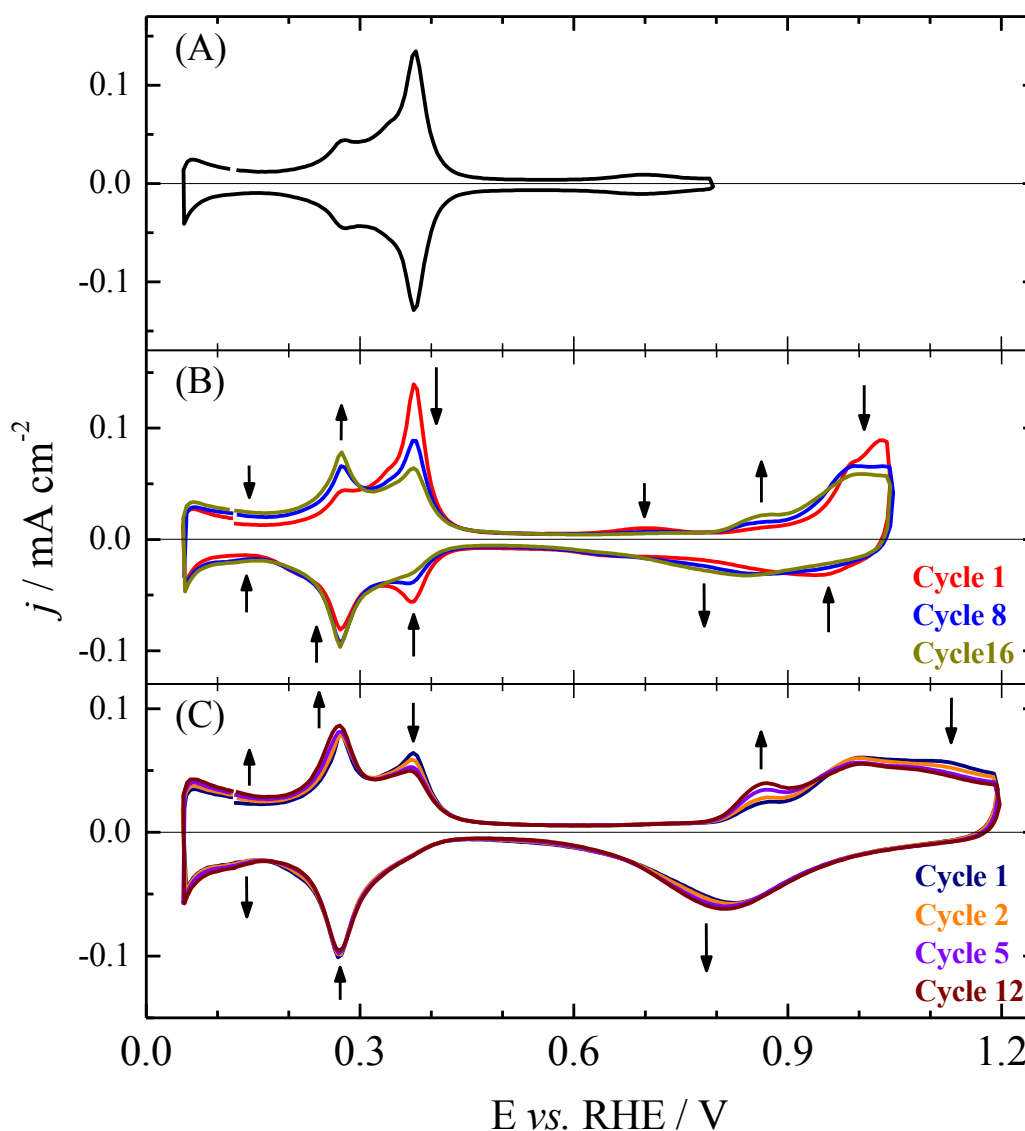

**Figure S1:** CVs at  $50 \text{ mV s}^{-1}$  of Pt(100) surfaces. (A) well-ordered surface profiles; (B) defect processes by cycling up to 1.05V; (C) second part of the defect processes up to 1.20V. Electrolyte: 0.5 M  $\text{H}_2\text{SO}_4$  aqueous solution.

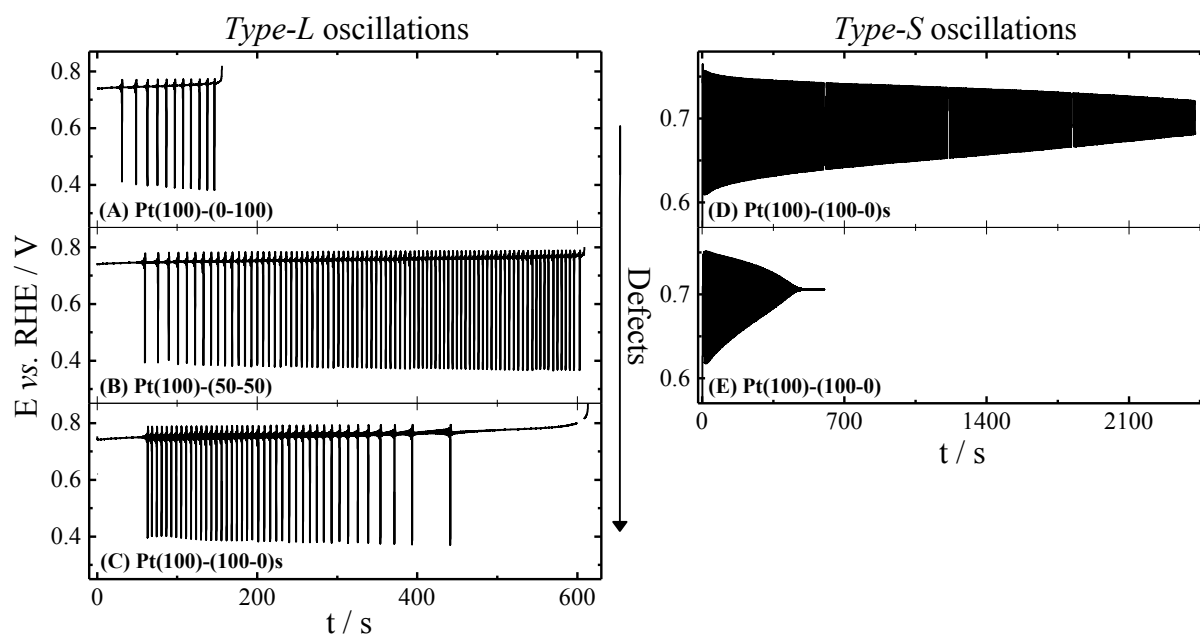

**Figure S2:** Potential oscillation during galvanostatic measurements of 0.2M MeOH and 0.5M  $H_2SO_4$  on (A) Pt(100)-(0-100), (B) Pt(100)-(50-50), (C) and (D) Pt(100)-(100-0)s, and Pt(100)-(100-0).

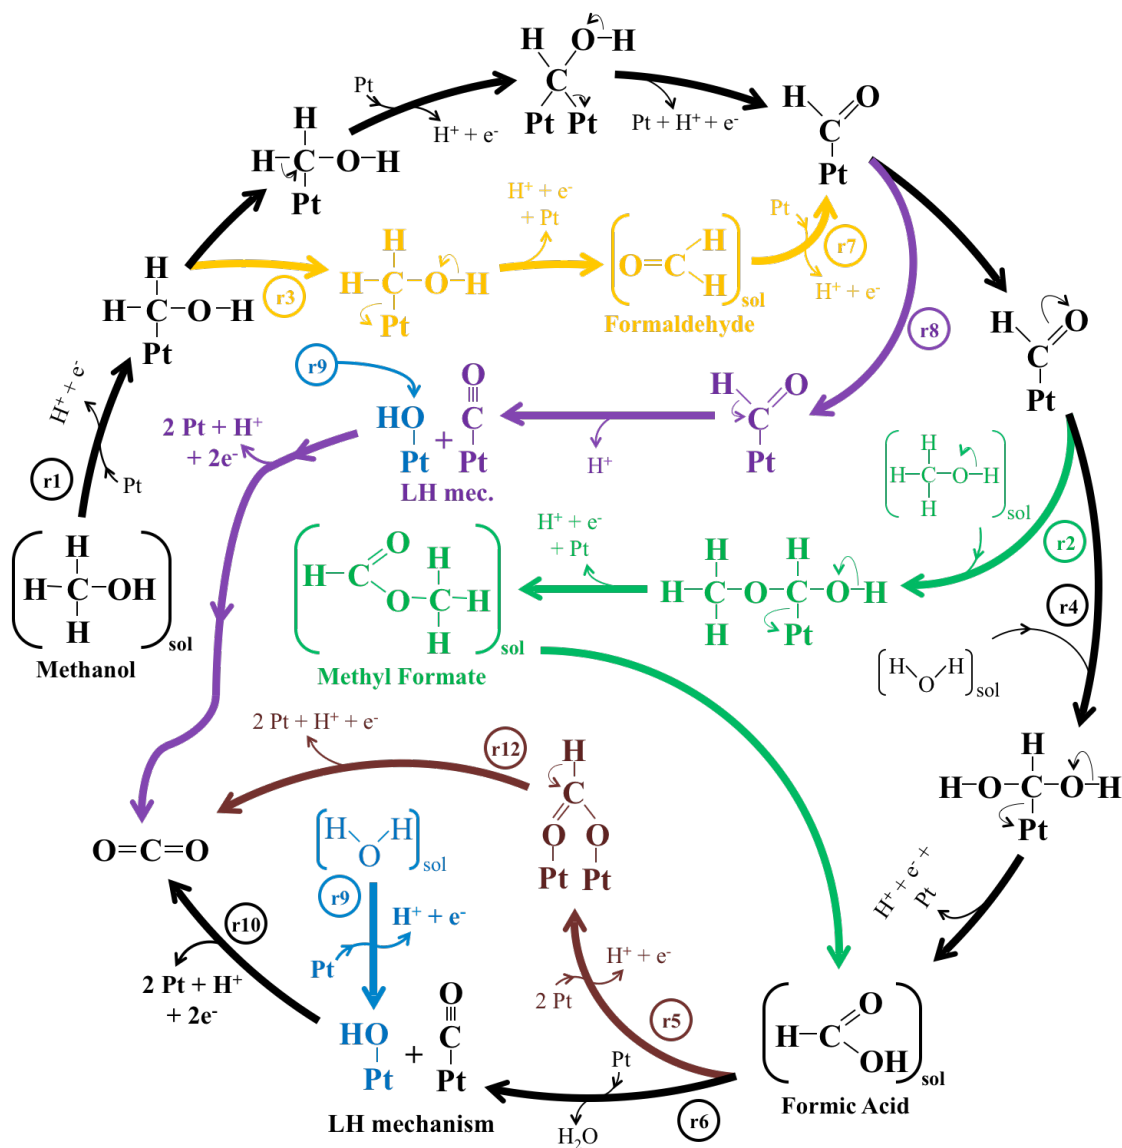

**Figure S3:** Reactions scheme of the main steps along the electro-oxidation of methanol on platinum in acidic media.
